# Supplementary material for: Development and validation of a clinical model (DREAM-LDL) for post-stroke cognitive impairment at 6 months
Source: publisher site journal article supplement (doi:10.18632/aging.203507), 2021-09-10
Supplement: Supplementary file [file aging-v13i17-203507-supplementary-material-SD2.pdf]

## SUPPLEMENTARY TABLES

Supplementary Table 1. The risk factors of PSCI at 6-month in logistic regression model.

| Variables                                   | Univariable analysis |        |      | Multivariable analysis,<br>as categorical variable |        |      |
|---------------------------------------------|----------------------|--------|------|----------------------------------------------------|--------|------|
|                                             | Odds ratio           | 95% CI |      | Odds ratio                                         | 95% CI |      |
| <b>Age, each year</b>                       | 1.08                 | 1.00   | 1.04 | 1.15                                               | 0.66   | 2.02 |
| >63yrs                                      | 1.38                 | 0.91   | 2.12 |                                                    |        |      |
| >80yrs                                      | 1.61                 | 0.65   | 4.01 |                                                    |        |      |
| <b>Level of education,<br/>each 3 years</b> | 0.69                 | 0.54   | 0.86 |                                                    |        |      |
| More than 9 years                           | 0.52                 | 0.42   | 0.64 | 0.85                                               | 0.63   | 1.14 |
| <b>MoCA, each point</b>                     | 0.63                 | 0.56   | 0.70 | 0.74                                               | 0.69   | 0.78 |
| <b>Diabetes mellitus</b>                    | 1.28                 | 0.83   | 1.97 |                                                    |        |      |
| Glucose level, 1 mmol                       | 1.05                 | 0.98   | 1.14 | 1.06                                               | 0.58   | 1.95 |
| Glucose level>5.4mmol/l                     | 1.49                 | 0.97   | 2.29 |                                                    |        |      |
| <b>Severity of Stroke</b>                   |                      |        |      | 1.00                                               | 0.67   | 1.38 |
| Baseline NIHSS score,1 point                | 1.04                 | 1.00   | 1.08 |                                                    |        |      |
| NIHSS>8 points                              | 1.65                 | 1.04   | 2.63 |                                                    |        |      |
| NIHSS>15 points                             | 1.29                 | 0.98   | 1.70 |                                                    |        |      |
| <b>LDL level, 1 mmol/L</b>                  | 1.02                 | 0.96   | 1.09 | 0.76                                               | 0.43   | 1.33 |
| Appropriate LDL(1.8-2.6mmol/L)              | 0.69                 | 0.45   | 1.05 |                                                    |        |      |

**Supplementary Table 2. Multivariate logistic regression analysis of the risk factors for PSCI at 6 months included in the predictive model for the patients from 2 of the 4 study centers (Huashan Hospital and the Tenth People’s Hospital) (N=281).**

| <b>Variables</b>                          | <b>Odds ratio</b> | <b>95% Confidential interval</b> |         | <b>P value</b> |
|-------------------------------------------|-------------------|----------------------------------|---------|----------------|
| <b>Baseline MoCA</b>                      | 15.454            | 8.466                            | -28.210 | 0.000          |
| <b>Level of education</b>                 |                   |                                  |         |                |
| <9 years, n (%)                           | 1.788             | 0.986                            | -3.240  | 0.056          |
| 9-11 years                                | 1.825             | 0.908                            | -3.667  | 0.091          |
| ≥12 years                                 | As refer          |                                  |         |                |
| <b>Age</b>                                |                   |                                  |         |                |
| ≤63 years old                             | As refer          |                                  |         |                |
| 64-79 years old                           | 1.052             | 0.551                            | -2.010  | 0.878          |
| ≥80 years old                             | 0.902             | 0.488                            | -1.669  | 0.743          |
| <b>FBG</b>                                |                   |                                  |         |                |
| ≤5.4mmol/L                                | As refer          |                                  |         |                |
| 5.5-7.0 mmol/L                            | 1.572             | 0.834                            | -2.963  | 0.162          |
| ≥7.1mmol/L                                | 1.191             | 0.641                            | -2.213  | 0.581          |
| <b>LDL-C</b>                              |                   |                                  |         |                |
| 1.8-2.5 mmol/L                            | As refer          |                                  |         |                |
| <1.8mmol/L or ≥2.6mmol/L                  | 1.364             | 0.774                            | --2.404 | 0.284          |
| <b>Severity of Stroke (NIHSS, points)</b> |                   |                                  |         |                |
| Moderate (NIHSS 9-14), n (%)              | 1.060             | 0.610                            | -1.842  | 0.836          |
| Severe (NIHSS≥15), n (%)                  | 0.848             | 0.371                            | --1.939 | 0.697          |
| Atrial fibrillation                       | 1.172             | 0.638                            | - 2.154 | 0.638          |

FBG, fasting blood glucose level; OR, odd ratio; CI, confidential interval; LDL-C, low density lipoprotein (LDL) cholesterol; NIHSS, National Institution of Health Stroke Scale.
